# Supplementary material for: Amphiphobic surfaces from functionalized TiO2nanotube arrays
Source: Royal Society of Chemistry journal article supplement (doi:10.1039/c4ra06402j), 2014-01-01
Supplement: c4ra06402j1.pdf [file c4ra06402j1.pdf]

## SUPPORTING INFORMATION

### Amphiphobic surfaces from functionalized TiO<sub>2</sub> nanotube arrays

*Samira Farsinezhad<sup>1</sup>, Prashant R. Waghmare<sup>2</sup>, Benjamin D. Wiltshire,<sup>1</sup> Himani Sharma,<sup>1</sup> Saeid Amiri,<sup>3</sup> Sushanta K. Mitra<sup>2</sup> and Karthik Shankar<sup>1,4</sup>*

<sup>1</sup>Department of Electrical & Computer Engineering, University of Alberta, Edmonton, Alberta T6G 2V4, Canada

<sup>2</sup>Department of Mechanical Engineering, University of Alberta, Edmonton, Alberta T6G 2V4, Canada

<sup>3</sup>Wave Control Systems Ltd., 9612-60th Ave. NW, Edmonton AB T6E 0C1

<sup>4</sup>National Institute for Nanotechnology, National Research Council Canada, Edmonton, Alberta T6G 2M9, Canada

#### CONTENTS:

1. Table S1
2. Table S2
3. Table S3
4. Table S4
5. Derivation of Equation 6
6. Derivation of Equation 8
7. Fig. S3
8. Fig. S4

Supplementary Table S1: Identification and assignment of XPS peaks obtained from from TiO<sub>2</sub> thin films and nanotubes coated by PFNA and PDPFA monolayers

| Samples                                               | Elements (Region) | Peak Positions (eV)                                                        | Chemical entities             |
|-------------------------------------------------------|-------------------|----------------------------------------------------------------------------|-------------------------------|
| TiO <sub>2</sub> –PFNA<br>(thin films and nanotubes)  | Ti                | 458.7 ± 0.2 eV (2p <sub>3/2</sub> )<br>464.5 ± 0.3 eV (2p <sub>1/2</sub> ) | TiO <sub>2</sub>              |
|                                                       | O                 | 530.2 eV (O1s)                                                             | -O-                           |
|                                                       | C(1s)             | 284.6 eV ± 0.3 eV (C1s)                                                    | graphitic carbon              |
|                                                       | C                 | 285.0 ± 0.5 eV                                                             | (C-H), sp <sup>3</sup> carbon |
|                                                       | C                 | 286.4 ± 0.5 eV                                                             | (C=O), >C=O                   |
|                                                       | C                 | 288.5 ± 0.5 eV                                                             | COOH + C(O)-OC                |
|                                                       | F                 | 689 ± 0.5 eV                                                               | C-F                           |
|                                                       | N                 | 400 eV – 402 eV                                                            | -CN, N=O, -CONH <sub>2</sub>  |
| TiO <sub>2</sub> –PFDPA<br>(thin films and nanotubes) | Ti                | 458.7 ± 0.2 eV (2p <sub>3/2</sub> )<br>464.5 ± 0.3 eV (2p <sub>1/2</sub> ) | TiO <sub>2</sub>              |
|                                                       | O                 | 530.2 eV (O1s)                                                             | -O-                           |
|                                                       | C(1s)             | 284.6 eV ± 0.3 eV (C1s)                                                    | graphitic carbon              |
|                                                       | C                 | 286.4 ± 0.5 eV                                                             | (C=O), >C=O                   |
|                                                       | C                 | 292 ± 0.5 eV                                                               | CF <sub>2</sub>               |
|                                                       | C                 | 294 ± 0.5 eV                                                               | CF <sub>3</sub>               |
|                                                       | F                 | 689 ± 0.5 eV                                                               | C-F                           |
|                                                       | P                 | 132.4 to 135.8 eV<br>(as a function of oxygen environment)                 | P-C, P-O                      |
|                                                       | N                 | 400 eV – 402 eV                                                            | -CN, N=O, -CONH <sub>2</sub>  |

Supplementary Table S2: Contact angle (in degrees) for six different liquids on nine different substrates with the standard deviation determined from the average static contact angle. Also listed are the dispersive, polar and hydrogen-bonding components of the surface energy for each surface studied, calculating by the extended Fowkes method using the average contact angles for diiodomethane, ethylene glycol and water;  $\gamma_s = \gamma_s^d + \gamma_s^p + \gamma_s^h$ .

|                                                                                         |              |                             |                             |                             |                             |                                              |                                              |                                              |                                              |
|-----------------------------------------------------------------------------------------|--------------|-----------------------------|-----------------------------|-----------------------------|-----------------------------|----------------------------------------------|----------------------------------------------|----------------------------------------------|----------------------------------------------|
|                                                                                         | <i>TFE</i>   | <i>TFE</i> <sup>PPVNA</sup> | <i>TFE</i> <sup>PPDPA</sup> | <i>TNA</i> <sup>Large</sup> | <i>TNA</i> <sup>Small</sup> | <i>TNA</i> <sup>PPVNA</sup> <sub>Large</sub> | <i>TNA</i> <sup>PPVNA</sup> <sub>Small</sub> | <i>TNA</i> <sup>PPDPA</sup> <sub>Large</sub> | <i>TNA</i> <sup>PPDPA</sup> <sub>Small</sub> |
| Water                                                                                   | 23.5<br>±4.5 | 103.9<br>±15.5              | 110.0<br>±5.91              | < 5                         | < 5                         | > 170                                        | > 170                                        | > 170                                        | > 170                                        |
| Ethylene Glycol                                                                         | < 10         | 90.0<br>±2.4                | 77.8<br>±4.99               | < 5                         | < 5                         | 141.18±5.5                                   | 140.9±4.5                                    | 142.2<br>±1.32                               | 149.7<br>±0.22                               |
| Dimethylformamide                                                                       | < 10         | 42.8<br>±0.92               | 69.9<br>±2.58               | < 5                         | < 5                         | 114.5<br>±5.9                                | 110.7<br>±2.5                                | 132.2<br>±0.53                               | 140.0<br>±4.92                               |
| Dimethyl sulfoxide                                                                      | 32<br>±2.2   | 42.<br>5±4.22               | 68.7<br>±4.93               | < 5                         | < 5                         | 125.7<br>±3.5                                | 87.8<br>±23.3                                | 139.3<br>±1.44                               | 145.2<br>±2.61                               |
| Toluene                                                                                 | < 5          | 64.13±1.29                  | 75.7<br>±2.46               | < 5                         | < 5                         | 105.2<br>±0.8                                | 110.8<br>±3.44                               | 110.5<br>±0.91                               | 120.8<br>±2.17                               |
| Diiodomethane                                                                           | 31.3±2.42    | 110.1<br>±3.31              | 100.3<br>±1.38              | < 5                         | < 5                         | 134.5±1.59                                   | 140.4<br>±3.39                               | 144.6<br>±0.38                               | 143.5<br>±0.88                               |
| Dispersive component of solid surface energy - $\gamma_s^d$ (mN m <sup>-1</sup> )       | 33.27        | 1.65                        | 2.92                        | > 43.12                     | > 43.12                     | 1.40                                         | 0.59                                         | 0.30                                         | 0.64                                         |
| Polar component of solid surface energy - $\gamma_s^p$ (mN m <sup>-1</sup> )            | 14.60        | 15.56                       | 21.05                       | > 8.36                      | > 8.36                      | 0.06                                         | 0.08                                         | 0.24                                         | 0.06                                         |
| Hydrogen-bonding component of solid surface energy - $\gamma_s^h$ (mN m <sup>-1</sup> ) | 27.76        | 6.22                        | 2.13                        | > 27.17                     | > 27.17                     | < 0.88                                       | < 0.36                                       | < 0.20                                       | < 0.38                                       |
| Total surface energy - $\gamma_s$ (mN m <sup>-1</sup> )                                 | 75.63        | 23.42                       | 26.10                       | > 78.65                     | > 78.65                     | < 2.35                                       | < 1.03                                       | < 0.74                                       | < 1.07                                       |

Supplementary Table S3: Geometric parameters of nanotube-configurations studied here. The geometrical parameters of individual nanotube are obtained from SEM images.

|                          | $TNA_{Large}^{PFNA}$ | $TNA_{Small}^{PFNA}$ | $TNA_{Large}^{PFDDPA}$ | $TNA_{Small}^{PFDDPA}$ |
|--------------------------|----------------------|----------------------|------------------------|------------------------|
| d (thickness of wall) nm | 12                   | 15                   | 12                     | 15                     |
| R (outer radius) nm      | 75                   | 37.5                 | 75                     | 37.5                   |
| H (height) $\mu$ m       | 17.5                 | 6                    | 17.5                   | 6                      |

Supplementary Table S4: Theoretically predicted contact angles ( $\theta$ ) and the difference between the theory and the experimentally observed contact angle ( $\Delta\theta$ ). Here it is assumed that the nanotubes behave like a nanorod and there is finite gap between them.

| Liquid             | $TNA_{Large}^{PFNA}$ |                | $TNA_{Small}^{PFNA}$ |                | $TNA_{Large}^{PFDDPA}$ |                | $TNA_{Small}^{PFDDPA}$ |                |
|--------------------|----------------------|----------------|----------------------|----------------|------------------------|----------------|------------------------|----------------|
|                    | $\theta$             | $\Delta\theta$ | $\theta$             | $\Delta\theta$ | $\theta$               | $\Delta\theta$ | $\theta$               | $\Delta\theta$ |
| Ethylene Glycol    | 100.95               | 40.23          | 102.52               | 38.38          | 88.62                  | 53.58          | 90.57                  | 59.13          |
| Dimethylformamide  | 62.24                | 52.26          | 65.35                | 45.35          | 82.19                  | 50.01          | 84.36                  | 55.64          |
| Dimethyl sulfoxide | 62.05                | 63.65          | 65.16                | 22.64          | 81.23                  | 58.07          | 83.44                  | 61.76          |
| Toluene            | 77.62                | 27.38          | 79.98                | 30.82          | 86.89                  | 28.61          | 88.90                  | 31.90          |
| Diiodomethane      | 116.43               | 18.07          | 117.61               | 22.79          | 107.80                 | 37.20          | 109.19                 | 34.31          |
| Hexane             | 62.11                | 10.69          | 65.22                | 28.02          | 69.83                  | 38.83          | 72.53                  | 67.53          |

Derivation of Equation (6):

TiO<sub>2</sub> nanotubes formed by anodization in ethylene glycol-based electrolytes pack in a triangular lattice, whose unit cell is the shaded area shown below in Fig. S1a, which is an equilateral triangle with each side of length  $2R_0+s$  where  $R_0$  is the radius of the nanotubes and  $s$  is the inter-tubular gap. In Fig. S1b, the shaded area indicates the geometric area fraction occupied by TiO<sub>2</sub> nanotubes. From symmetry considerations, each nanotube contributes  $1/6^{\text{th}}$  of an annulus. The average value of all the above geometrical parameters, as estimated from scanning electron micrographs, were used to calculate the area fraction parameter  $f_{st}$ .

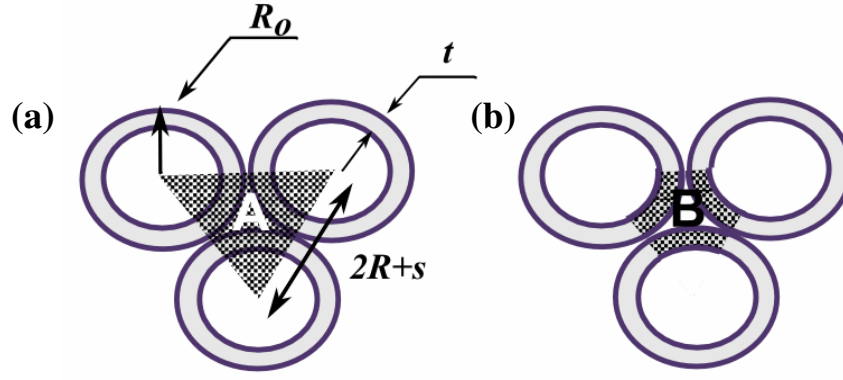

**Figure S1:** First scenario considered for the analysis: the unit cell consists of three hollow nanotubes with radius  $R_0$ , wall-thickness  $t$  and inter-tube spacing  $s$

$$f_{sl} = \frac{\text{Area}(B)}{\text{Area}(A)} = \frac{\frac{\pi}{2}[R_0^2 - (R_0 - t)^2]}{\frac{\sqrt{3}}{4}(2R_0 + s)^2} \quad (6a)$$

$$f_{sl} = \frac{\frac{\pi}{2}[R_0^2 - R_0^2 + 2tR_0 - t^2]}{\sqrt{3} \times R_0^2 \left(1 + \left(\frac{s}{2R_0}\right)^2\right)^2} = \frac{\frac{\pi}{2}R_0^2 \left[\frac{2t}{R_0} - \left(\frac{t}{R_0}\right)^2\right]}{\sqrt{3} \times R_0^2 \left(1 + \left(\frac{s}{2R_0}\right)^2\right)^2} \quad (6b)$$

$$f_{sl} = \frac{\frac{2t}{R_0} - \left(\frac{t}{R_0}\right)^2}{\frac{2\sqrt{3}}{\pi} \left[1 + \left(\frac{s}{2R_0}\right)^2\right]} \quad (6c)$$

Derivation of Equation (8):

Here, the area fraction parameter of nanorods arranged in a triangular lattice is sought.

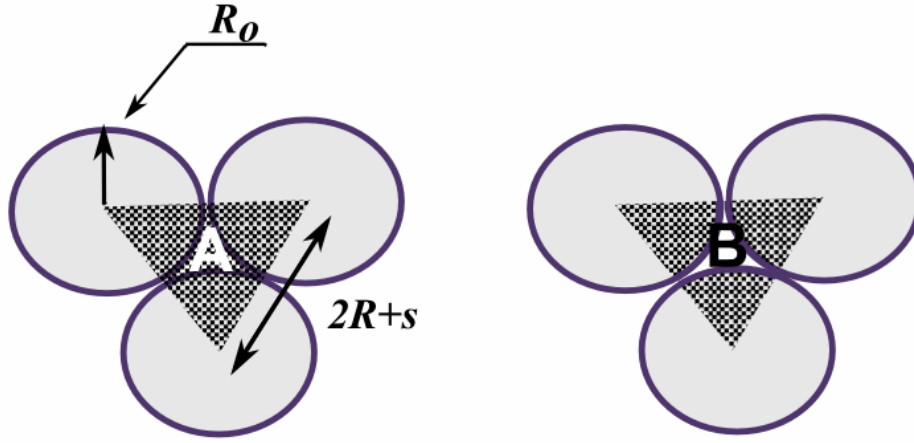

**Figure S2:** Second scenario considered for the analysis: The nanotubes are considered as solid nanorods of outer radius  $R_0$  and there is a finite gap  $s$  in between them.

$$f_{sl} = \frac{\text{Area (B)}}{\text{Area (A)}} = \frac{\frac{\pi}{2}[R_0^2]}{\frac{\sqrt{3}}{4}(2R_0 + s)^2} \quad (8a)$$

$$f_{sl} = \frac{\frac{\pi}{2}[R_0^2]}{\sqrt{3} \times R_0^2 \left(1 + \left(\frac{s}{2R_0}\right)\right)^2} = \frac{\frac{\pi}{2}[R_0^2]}{\sqrt{3} \times R_0^2 \left(1 + \left(\frac{s}{2R_0}\right)\right)^2} \quad (8b)$$

$$f_{sl}^{rod} = \frac{\pi}{2\sqrt{3}} \left(1 + \frac{s}{2R_0}\right)^{-2} \quad (8c)$$

### Pre- and Post- Immersion in other solvents – Contact Angle Sustainability

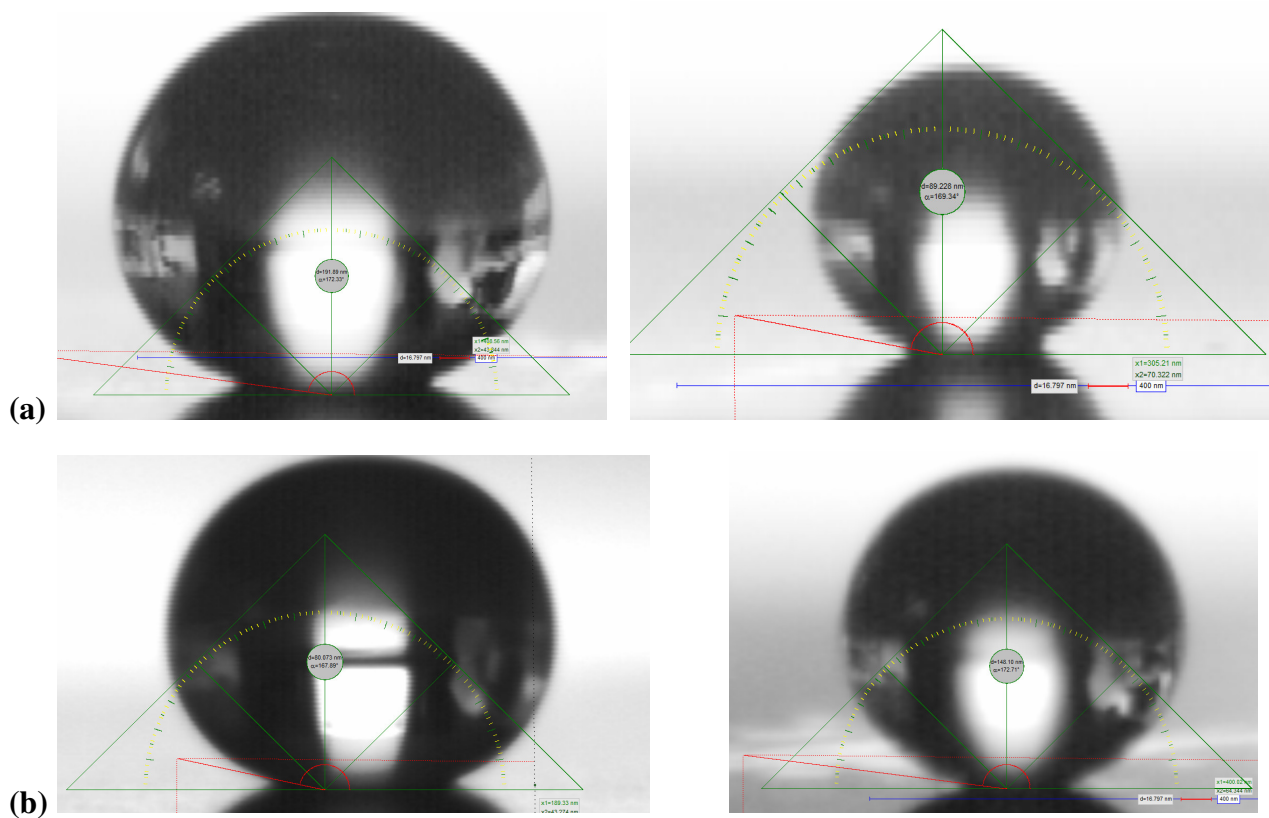

**Figure S3:** Static contact angles of water on PFDPA-coated (a) large diameter nanotube arrays and (b) small diameter nanotube arrays. Images on left are pre-immersion treatment, on the right are post-immersion treatment in water. The contact angle is unchanged.

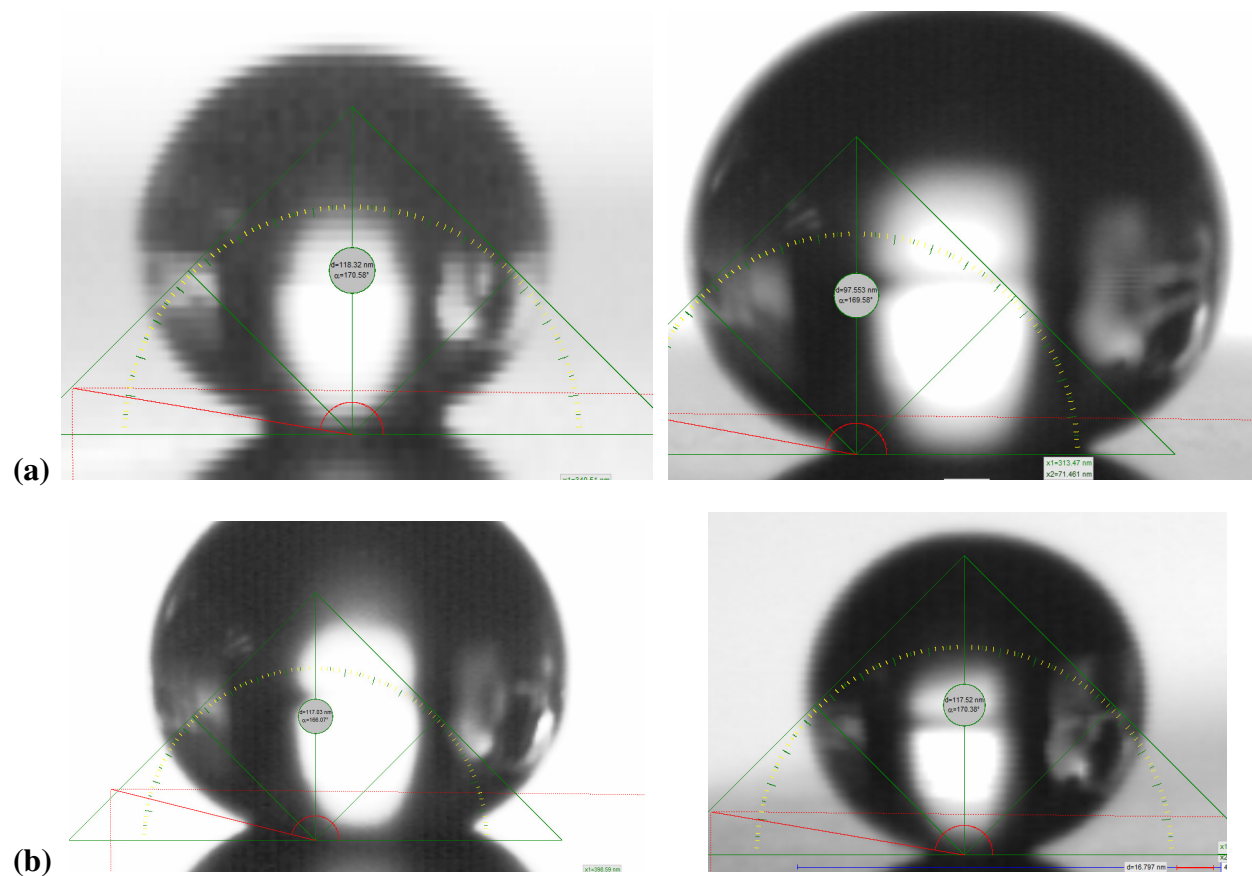

**Figure S4:** Static contact angles of water on PFDPA-coated (a) large diameter nanotube arrays and (b) small diameter nanotube arrays. Images on left are pre-immersion treatment, on the right are post-immersion treatment in ethylene glycol. The contact angle is unchanged.
